# Supplementary material for: Negatively charged gold nanoclusters protect against diabetic cardiomyopathy by inhibiting mitophagy
Source: Royal Society of Chemistry journal article supplement (doi:10.1039/d2nj01536f), 2022-01-01
Supplement: d2nj01536f1.pdf [file d2nj01536f1.pdf]

## Supplementary materials

### Contents

**Table S1** Materials particle sizes

**Figure S1** Zeta potential of materials. (A) PEI-M (B) PEG-M (C) PVP-M (D)PEI-N (E)PEG-N (F) PVP-N.

**Figure S2** H9C2 viability test by (A) MTT assay and (B) LDH assay in N-AuNCs group.

**Figure S3** Representative microscopy images of primary cardiomyocytes incubated with AuNCs and palmitate acid for 24 h. The cardiomyocytes were stained by mitotracker red and green DCFH-DA (scale bar: 100  $\mu$ m).

**Figure S4** (A) JC-1 and (B) ROS fluorescence staining in H9C2 cells treated with AuNCs, M-AuNCs, and N-AuNCs.

**Table S1** Materials particle sizes

| Materials | Size (nm) | St Dev(nm) |
|-----------|-----------|------------|
| PEI-M     | 8.768     | 0.910      |
| PEG-M     | 3.635     | 0.377      |
| PVP-M     | 1.155     | 0.138      |
| PEI-N     | 6.377     | 1.306      |
| PEG-N     | 35.370    | 6.800      |
| PVP-N     | 12.44     | 2.132      |

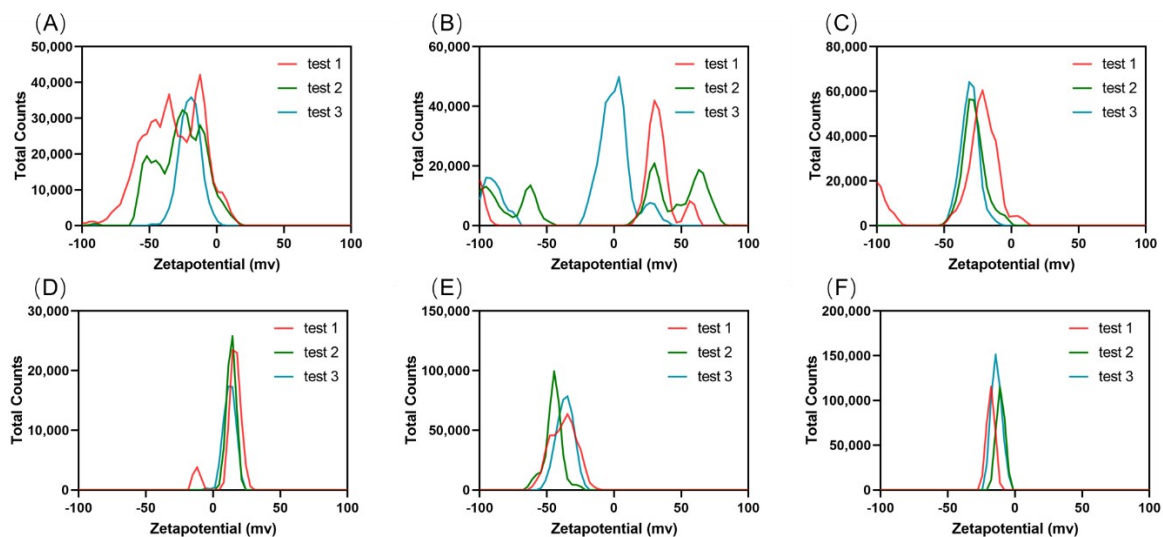

**Figure S1** Zeta potential of materials. (A) PEI-M (B) PEG-M (C) PVP-M (D)PEI-N (E)PEG-N (F) PVP-N.

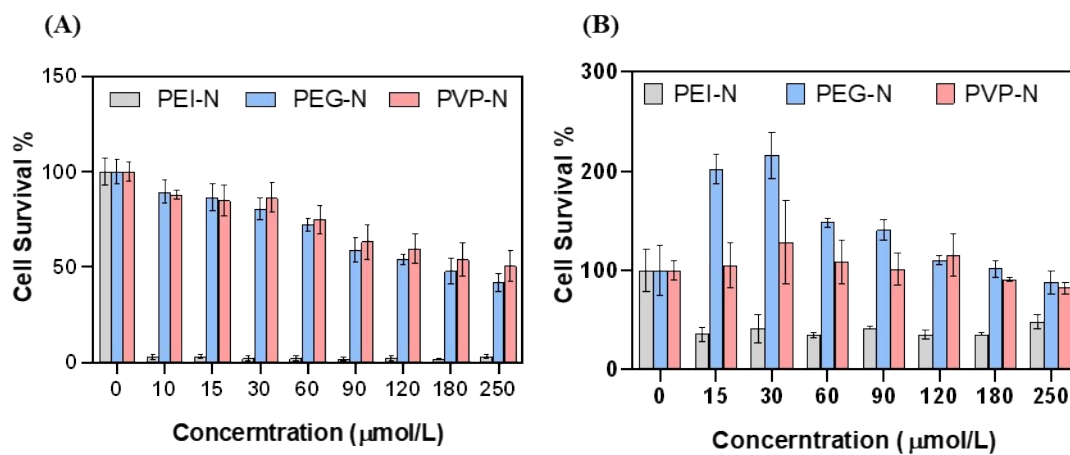

**Figure S2** H9C2 viability test by (A) MTT assay and (B) LDH assay in N-AuNCs group.

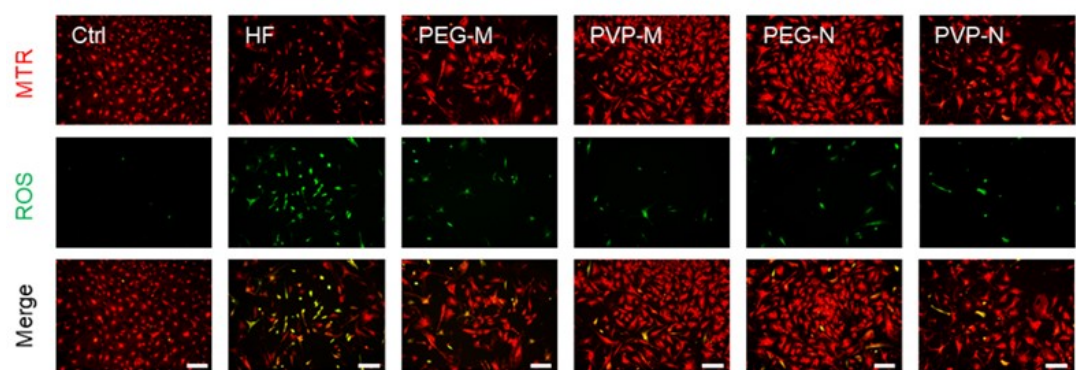

**Figure S3** Representative microscopy images of primary cardiomyocytes incubated with AuNCs and palmitate acid for 24 h. The cardiomyocytes were stained by mitotracker red and green DCFH-DA (scale bar: 100  $\mu$ m).

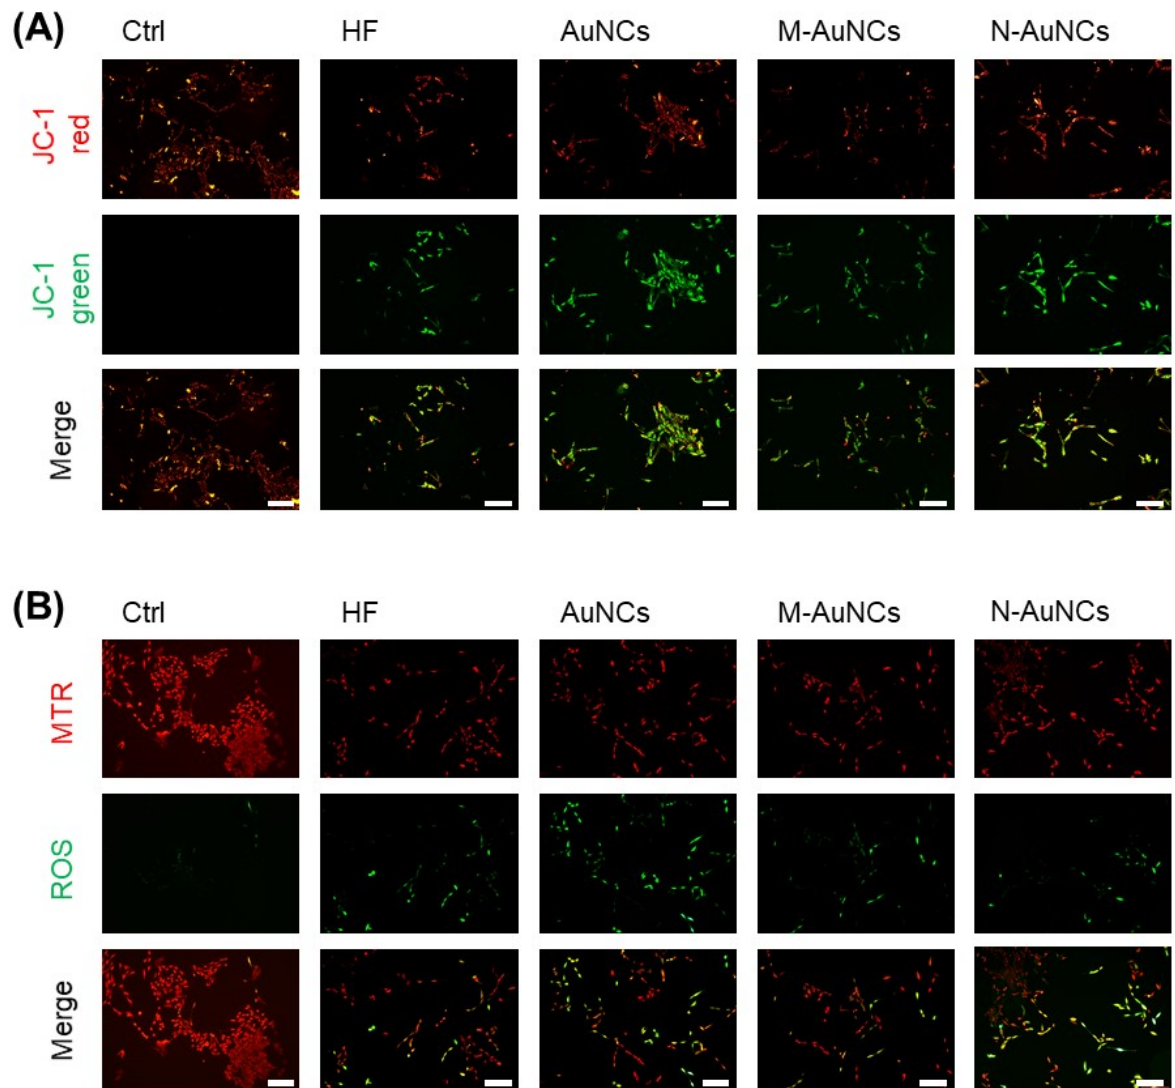

**Figure S4** (A) JC-1 and (B) ROS fluorescence staining in H9C2 cells treated with AuNCs, M-AuNCs, and N-AuNCs.
